## Chronic activation profile of circulating CD8+ T cells in Sézary syndrome

Marina Passos Torrealba<sup>1</sup>, Kelly Cristina Manfrere<sup>1</sup>, Denis R. Miyashiro<sup>2</sup>, Josenilson F. Lima<sup>1</sup>, Luana de M. Oliveira<sup>1</sup>, Nátalli Z. Pereira<sup>1</sup>, Jade Cury-Martins<sup>2</sup>, Juliana Pereira<sup>3</sup>, Alberto J.S. Duarte<sup>1</sup>, Maria N. Sato<sup>1,\*</sup> and José A. Sanches<sup>2,\*</sup>

<sup>1</sup>Medical Investigation Laboratory (LIM-56), Tropical Medicine Institute of São Paulo, Department of Dermatology, University of São Paulo Medical School, São Paulo, Brazil

<sup>2</sup>Cutaneous Lymphoma Clinic, Hospital das Clínicas, Department of Dermatology, University of São Paulo Medical School, São Paulo, Brazil

<sup>3</sup>Hematology Department, Hospital das Clínicas, University of São Paulo Medical School, São Paulo, Brazil

\*These authors share the mentorship, critical revision and supervision of this study

**Correspondence to:** Marina Passos Torrealba, **email:** marinatorrealba@usp.br

**Keywords:** Sézary syndrome; CD8+ T cells; chronic activation markers; sCD38; sCD127

**Received:** October 12, 2017

**Accepted:** December 01, 2017

**Published:** December 16, 2017

**Copyright:** Torrealba et al. This is an open-access article distributed under the terms of the Creative Commons Attribution License 3.0 (CC BY 3.0), which permits unrestricted use, distribution, and reproduction in any medium, provided the original author and source are credited.

### ABSTRACT

**Sézary syndrome (SS) is a leukemic variant of cutaneous T cell lymphoma (CTCL), and the neoplastic CD4+ T cells of SS patients undergo intense clonal proliferation. Although Sézary cells have been studied extensively, studies on adaptive immunity regarding CD8+ T cells are scarce. This study aimed to investigate activation marker expression in CD8+ T cells according to the differentiation stages and IL-7/IL7R $\alpha$  axis responses of patients with SS. Moreover, this study aimed to verify the soluble forms of CD38, sCD127 and IL-7 in serum. Although the SS patients of our cohort had reduced numbers of CD8+ T cells, they exhibited higher percentages of CD8+CD38+ T cells, mainly effector/memory CD8+ T cells, than the control group. In contrast, down-regulated expression of the activation markers CD127/IL-7R and CD26 was found in the CD8+ T cells of SS patients. High serum levels of sCD38 and sCD127 and scarce serum levels of IL-7 were detected, emphasizing the immune activation status of SS patients. Moreover, CD8+ T cells from SS patients exhibited IL-7 unresponsiveness to STAT5 phosphorylation and Bcl-2 expression, and IL-7 priming partially restored IFN $\gamma$  production. Our findings showed a chronic activation profile of CD8+ T cells, as an attenuated cytotoxic profile and impaired IL-7 responsiveness was observed, suggesting chronic activation status of CD8+ T cells in SS patients.**

### INTRODUCTION

Sézary syndrome (SS) is a rare, aggressive leukemic type of cutaneous T cell lymphoma (CTCL) in which malignant T cells are found in skin, blood and lymph nodes [1]. Sézary patients are considered to be in advanced disease stages and have a median survival time of approximately 1 to 5 years [2], with bacterial sepsis being the main cause of death [3]. Impairment of cellular immunity has long been described in SS and contributes to the significant morbidity and mortality associated with

infectious complications in SS patients [4]. Defects in innate and adaptive immunity, including altered Toll-like receptor (TLR) activation responses [5], natural killer (NK) cells [6], dendritic cells [7] and T cell-mediated immunity [8], with cytokine signaling pathways described in CTCL.

The constitutive activation of STAT5 and STAT3 has been observed in early and late CTCL stages, respectively [9]. In early stages, IL-2, IL-7 and IL-15 signaling via the JAK1 and JAK3 kinases are believed to be responsible for activating STAT5, while in advanced stages of development, IL-21 autocrine signaling is thought to be important for

STAT3 activation [9, 10]. In this context, the deregulated Jak3/STAT3/STAT5 signaling in CTCL cells may contribute to the impairment of co-stimulation with CD8+ T cells.

Co-stimulation via CD26, dipeptidyl peptidase IV, in CD8+ T cells may lead to effector functions induced by cytotoxic effects, preferentially via granzyme B, IFN $\gamma$  production and Fas ligand expression [11]. However, while the absence of CD26 expression is a useful marker for the diagnosis of CD4+ T cell lymphoma in SS patients [12], their CD8+ T cell profile is unknown.

Some cytokines, including IL-7, is crucial for homeostasis, proliferation and life support of CD8+ T lymphocytes [13]. In CTCL, the number of circulating CD8+ T cells is correlated with a better patient outcome [14], and reduced numbers of tumour-infiltrating CD8+ T cells in biopsied CTCL lesions are related to a lack of response to photopheresis therapy [15] and disease progression [16]. Tumour load can chronically stimulate CD8+ T cells, leading to phenotypic changes and functional impairment [17].

In the current study, we examined the activation/exhaustion status of CD8+ T cells in various differentiation stages, cytokine production, and IL-7 responsiveness. We observed a loss of CD26 and CD127 expression in effector CD8+ T cells that was associated with CD38 expression and dysfunctional IL-7 response in SS, demonstrating the chronic activation status of CD8+ T cells.

## RESULTS

### Chronic activation of circulating CD8+T cells in Sézary patients

Laboratorial characteristics of SS patients are shown in Table 1. All patients were determined to be de novo erythrodermic with intense pruritus and showed at least three laboratorial characteristics of SS, including cell counts >1000/mm<sup>3</sup>; T cell clonality skin and blood; and CD4/CD8 ratios >10%, CD4+CD26- ratios >40% and CD4+CD7- ratios >30%.

Reduced numbers of circulating CD8+ T cells have been correlated with the decreased survival probability of CTCL patients [14]. To verify the phenotypic and functional profile of CD8+T cells in SS patients, we first analysed the memory differentiation subsets of peripheral blood CD8+ T cells from Sézary patients and HDs according to their expression of CCR7 and CD45RA. Figure 1A shows a reduced percentage of naïve CD8+ T cells in SS patients compared to that in HDs, whereas no differences were observed between the other subsets.

IL-7 signals are vital to T cell development, as they promote the survival of both naïve and memory CD8+ T cells [18]. We verified low percentage of CD127/IL-7 $\alpha$  in total and all memory-differentiating CD8+ T cell subsets (Figure 1B). Also, SS patients showed an increased percentage of CD38+, mostly in effector cells (Figure 1C),

an activation marker often related to chronic viral infection activation [19].

Moreover, we evaluated exhaustion markers in CD8+ T cells (Supplementary Figure 1), such as PD-1, Tim-3 and CD39, but no differences were verified between the groups.

Taken together, our data provide evidence of a chronic activation profile of circulating CD8+ T cells in Sézary patients.

### Sézary patients exhibit impaired CD26 expression in CD8+ T cells

We assessed CD26 in CD8+ T cells of Sézary patients to verify whether the chronic activation marker CD38 is associated with other activation molecules. The CD26 enzyme is a type II transmembrane glycoprotein that plays a key role in immune regulation as a T cell activation molecule [11].

Figure 2A presents reduced numbers of peripheral blood CD8+CD26+ T cells as well as median fluorescence intensity (MFI) levels in SS patients compared to those in HDs. In addition, most of CD8+CD26+ T cells from HDs were effector T cells (Figure 2A) unlike SS group, that CD8+CD26+ T cells were equally distributed between memory differentiation subsets. We verified that the high CD38 expression in SS group were independent of CD26 expression, as were observed in both populations, CD8+CD26+ and CD8+CD26- T cells. However, similarly to both groups, CD38 expression was higher in CD8+CD26- T cells when compared to CD8+CD26+ (Figure 2B). The same phenomenon was observed for CD127/IL-7R $\alpha$ , as their pronounced decreased expression was observed in CD8+CD26- T cells of SS patients.

Next, we evaluated the expression levels of TNF, CD69 (an early activation marker) and PD-1 (an inhibition receptor) according to CD26 expression in CD8+ T cells upon stimulation. The TLR7/8 agonist was previously shown to partially restore interferon (IFN) responses in CMNs of SS patients [20]. We observed increased CD69 and TNF expression in CD26+ cells compared to that in CD26- cells in the constitutive condition and upon TLR7/8 agonist addition of in both of the groups analysed (Figure 2C). In the unstimulated condition, impaired TNF expression was detected in the SS group regardless of CD26 expression in CD8+ T cells. However, with TLR7/TLR8 stimulation, only CD26- cell numbers were decreased in SS patients, and no differences in IFN $\gamma$  production or CD107a expression were detected in CD8+ T cells (Supplementary Figure 2).

### Impaired IL-7 signaling in the CD8+ T cells of Sézary patients

The verified upregulation of CD38 in the CD8+ T cells of Sézary patients together with the altered CD127/IL-7R $\alpha$

**Table 1: Sézary syndrome patient's characteristics**

| Patient | Gender       | Age        | WBC /mm <sup>3</sup> | Lymphoc. /mm <sup>3</sup> | Sézary c. | Clonality TCR |      |                       |                                 |                                |                       |          |
|---------|--------------|------------|----------------------|---------------------------|-----------|---------------|------|-----------------------|---------------------------------|--------------------------------|-----------------------|----------|
|         |              |            |                      |                           |           | Blood         | Skin | CD4+ /mm <sup>3</sup> | CD4+ CD26- /mm <sup>3</sup> (%) | CD4+ CD7- /mm <sup>3</sup> (%) | CD8+ /mm <sup>3</sup> | CD4/ CD8 |
| 1       | F            | 75         | 16500                | 10200                     | +         | +             | +    | 9690                  | 7267 (75)                       | ND                             | 204                   | 47       |
| 2       | F            | 55         | 23280                | 18830                     | +         | +             | +    | 18077                 | 17715 (98)                      | 17535 (97)                     | 377                   | 48       |
| 3       | M            | 56         | 9420                 | 980                       | -         | +             | ND   | 823                   | 296 (36)                        | 25 (3)                         | 29                    | 28       |
| 4       | M            | 70         | 9510                 | 2200                      | +         | +             | -    | 2068                  | 1861 (90)                       | ND                             | 66                    | 31       |
| 7       | M            | 57         | 11780                | 3490                      | +         | +             | +    | 3176                  | 2350 (74)                       | 2604 (82)                      | 174                   | 18       |
| 8       | M            | 68         | 11570                | 6830                      | +         | +             | ND   | 6251                  | 5376 (86)                       | 5063 (81)                      | 295                   | 22       |
| 9       | F            | 69         | 7370                 | 3260                      | -         | +             | +    | 2543                  | 2060 (81)                       | 585 (23)                       | 242                   | 6        |
| 10      | M            | 56         | 12700                | 7640                      | +         | +             | +    | 6647                  | 5251 (79)                       | ND                             | 153                   | 43       |
| 11      | M            | 62         | 16050                | 8670                      | +         | +             | +    | 8150                  | 4238 (52)                       | 3341 (41)                      | 347                   | 24       |
| 13      | M            | 48         | 44640                | 21430                     | +         | +             | +    | 20572                 | 4526 (22)                       | 411 (2)                        | 428                   | 48       |
| 15      | F            | 60         | 140870               | 131010                    | +         | +             | +    | 125767                | 120736 (96)                     | 120736 (96)                    | 5240                  | 24       |
| 16      | F            | 65         | 10700                | 3700                      | +         | +             | -    | 3293                  | 2700 (82)                       | 231 (7)                        | 148                   | 22       |
| 17      | F            | 70         | 32060                | 7370                      | +         | +             | +    | 6706                  | 5968 (89)                       | 4158 (62)                      | 147                   | 45       |
| 18      | F            | 76         | 5280                 | 1160                      | +         | +             | +    | 916                   | 540 (59)                        | 183 (20)                       | 81                    | 11       |
| 19      | F            | 58         | 12520                | 3090                      | +         | -             | -    | 2472                  | 1508 (61)                       | 49 (2)                         | 247                   | 10       |
| 20      | F            | 69         | 16990                | 4730                      | +         | +             | +    | 4209                  | 3325 (79)                       | 2147 (51)                      | 94                    | 44       |
| 21      | M            | 47         | 17440                | 8010                      | +         | -             | -    | 1940                  | 155 (8)                         | ND                             | 652                   | 3        |
| 22      | F            | 57         | 3100                 | 680                       | +         | +             | +    | 401                   | 56 (14)                         | 80 (20)                        | 68                    | 6        |
| 23      | M            | 33         | 12280                | 1620                      | +         | +             | +    | 1296                  | 687 (53)                        | 635 (49)                       | 130                   | 10       |
| HD (28) | 14/F<br>14/M | 54 (30-85) | ND                   | ND                        | ND        | ND            | ND   | ND                    | ND                              | ND                             | ND                    | ND       |

F = female, M = male; (+) = presence of Sézary cells  $\geq 1000/\text{mm}^3$ ; ND = not done.

Reference value for: WBC 5000–10000/mm<sup>3</sup>; Lymph. 1000–3200/mm<sup>3</sup>; CD4+ 900–3400/mm<sup>3</sup>; CD8+300–1000/mm<sup>3</sup>.

expression led us to evaluate the IL-7 signaling pathway. The serum levels of IL-7 and the soluble form of CD127/IL-7R $\alpha$  (sCD127) showed opposite trends, as decreased IL-7 levels and increased sCD127 levels were observed in SS patients compared to HDs (Figure 3A and 3B).

Because CD127/IL-7R $\alpha$  was down-regulated in CD8+ T cells and circulating sCD127 was increased, we analysed IL-7 signaling via STAT5 phosphorylation and Bcl-2 expression. CD8+ T cells from Sézary patients exhibited impaired pSTAT5 and Bcl-2 expression compared to those from HDs (Figure 3C and 3D, respectively), revealing an impaired responsiveness of CD8+ T cells to IL-7 in SS, which could impact their homeostatic function.

Considering that IL-7 can restore lymphocytic functions, such as IFN $\gamma$  production and proliferation [21], we also evaluated the ability of IL-7 to induce cytotoxic molecules in CD8+ T cells. As expected, CD8+ T cells from SS patients exhibited impaired IFN $\gamma$  production compared with those of the control group, and IL-7 priming

was able to partially restore IFN $\gamma$  production, albeit at decreased levels compared to that of the HD group.

We demonstrate that unstimulated CD8+ T cells from SS patients showed increased CD95/Fas expression compared to those from HDs (Figure 3E), whereas no IL-7 responsiveness upon the addition of PMA was observed. This finding showed an impaired response to IL-7 in the induction of CD95/Fas in Sézary patients.

## DISCUSSION

Impaired adaptive immune responses are well recognized in SS patients. Despite the reduced numbers of CD8+ T cells in our cohort of SS patients, they exhibited chronic activation profile of CD8+ T cell due to increased CD38 expression, mainly in effector memory cells, as well as attenuated cytotoxic profiles and impaired IL-7 responsiveness. Splitting the memory differentiation stages of peripheral blood CD8+ T cells in SS showed that

only the naïve subset was reduced, demonstrating altered homeostatic proliferation during circulation.

CD38 and HLA-DR expression was observed in circulating CD8+ T cells of SS patients and was associated with high serum levels of sCD38, suggesting heightened *immune activation in SS patients*. During chronic viral infections, such as HIV, increased CD38 expression in CD8+ T cells is correlated with disease progression [19] and offers an additional independent predictive value for evaluating plasma viral loads and CD4+ T cell counts [22]. Moreover, co-infection with hepatitis C virus and treatment with alpha interferon and ribavirin reduces activation [23]. HIV-1 infection

the paradoxical chronic immune activation, leads for co-infection, innate immunity stimulation [24, 25]. In Sézary patients the chronic activation of CD8+ T cells may occur due to the massive proliferation of malignant CD4 + T cells. Majority of the SS patients were naïve of treatment, except two cases (SS19 and SS22). The numbers of CD8+CD38+ T cells in these cases remained elevated (data not shown). This may suggest that similar to patients with chronic viral infections, increased CD38 expression in the CD8+ T cells of SS patients could be correlated with chronic activation.

T cell exhaustion is a state of dysfunction that commonly occurs during chronic infections and cancer

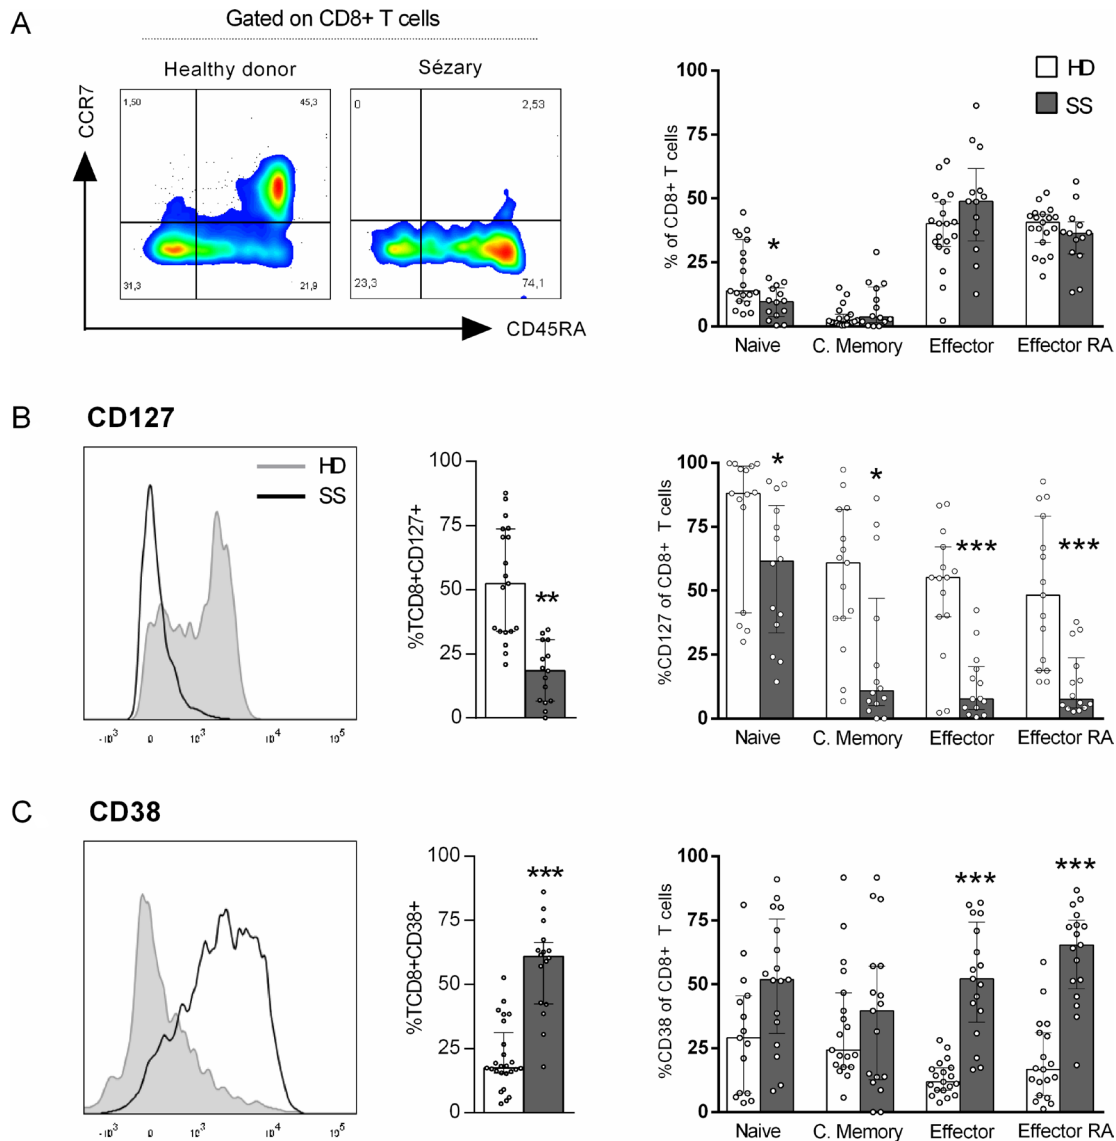

**Figure 1: Up-regulation of CD38 in CD8+ T cells from SS patients.** Peripheral blood CD8+ T cells from SS patients and healthy donors were assessed for memory differentiation subsets and activation markers by flow cytometry. Gating strategy: singlet, lymphocytes, CD3+, CD8+ and memory differentiation. (A) CD8+ T cells memory differentiation subsets ( $n = 14$  SS and 19 HD), (B) Total CD127+CD8+ T cells percentage ( $n = 15$  SS and 19 HD) and on CD8+ T cells differentiation subsets ( $n = 14$  SS and 15 HD), (C) Total CD38+CD8+ T cells percentage ( $n = 16$  SS and 25 HD) and on differentiation subset ( $n = 17$  SS and 19 HD). The data are shown as median and interquartil. \* $p \leq 0.05$ , \*\* $p \leq 0.01$ , \*\*\* $p \leq 0.001$ .

due to the persistence of antigens and inflammation [26]. During HIV-1 infection, innate immunity activation via ssRNA TLR7 signaling [27] due to intestinal bacterial translocation and/or co-infection may favor immune activation [28]. After persistent antigen exposure, CD8+ T cells undergo functional loss and exhibit increased expression of co-inhibitory receptors [29, 30]. Their cytotoxicity is modified, and their cytokine production ability, proliferative capacity and effective memory cell generation are also affected [30]. Moreover, HIV+ individuals in late stages of infection have lower numbers of HIV-specific T cell IFN $\gamma$  producers compared to HIV-specific responses during early HIV infection [31]. This scenario indicates that the accumulation of dysfunctional virus-specific T cells may reduce the functional repertoire of cells accessible for responding to other antigens [32]. Exhausted T cells lose their susceptibility to antigen-

independent activation by cytokines, which compromises their ability to detect bacterial co-infections. This could be a factor involved in the SS susceptibility to bacterial sepsis, the main cause of death for these patients [33].

Supporting the chronic activation status of CD8+ T cells in SS patients, decreased CD127 (IL-7R alpha) expression was detected according to the CD8+ T cell maturation stage, and the loss of CD127 expression has been linked to immune activation and reduced numbers of CD4+ T cells during HIV-1 infection [34]. Indeed, sCD38 levels have been shown to be increased during burn shock and significantly decreased post-burn compared to those in healthy volunteers [35]. Until now, sCD38 and sCD127 had not been evaluated in CTCL. The mCD38 expression and the serum levels of total sCD38 are markers of early post-burn lymphocyte activation, and seminal sCD38 is a pivotal regulator of fetal maternal tolerance [36]. Whether

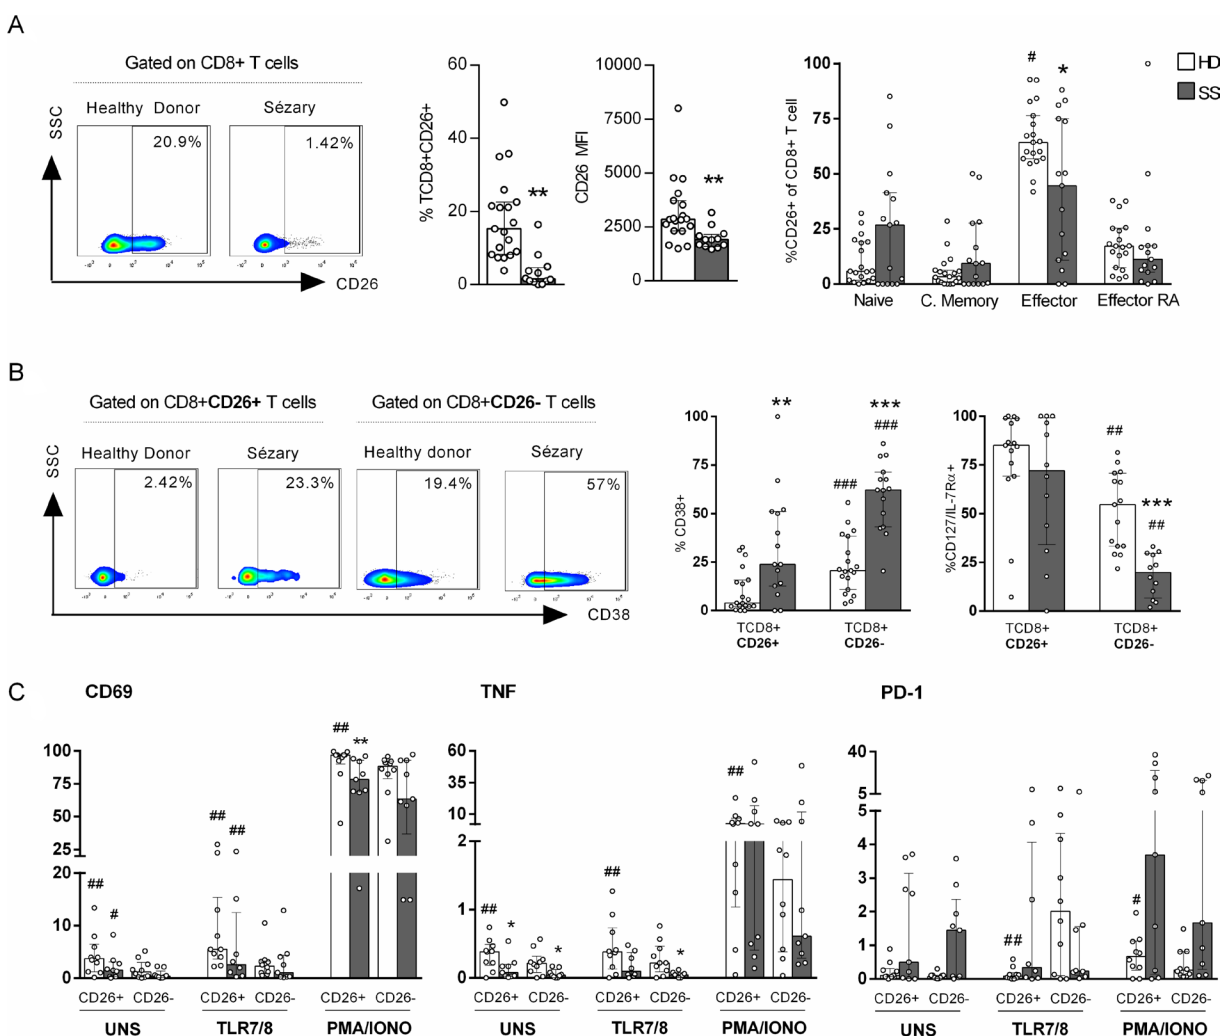

**Figure 2: Decreased expression of CD26+ on CD8+ T cells of Sézary patients.** CD8+ T cells from peripheral blood of SS patients and healthy donors were assessed for CD26+ expression by flow cytometry. PBMC were stimulated by PMA and Ionomycin or TLR 7/8 agonist (CL097). (A) Total CD26+ CD8+ T cells percentage, CD26 MFI and memory differentiation of CD8+CD26+ T cells ( $n = 15$  SS and 19 HD), (B) CD38 and CD127 ( $n = 15$  SS and 19 HD) expression on CD8+CD26+ and CD8+CD26- T cells, (C) CD69 and PD-1 expression, and TNF production on CD8+ T cells ( $n = 9$  SS and 10 HD). The data are shown as median and interquartil. \* $p \leq 0.05$ , \*\* $p \leq 0.01$ , \*\*\* $p \leq 0.001$  when compared between groups and # $p \leq 0.05$ , ### $p \leq 0.01$  when compared with the same group.

the increased levels of sCD38 in patients with SS are reflective of immune activation or play a regulatory role requires further investigation.

The IL-7/IL-7R axis plays important roles in the survival and expansion of T cells, and we found increased amounts of sCD127 (IL-7R $\alpha$ ) in serum and

reduced IL-7 levels in SS patients. In CTCL, IL-7 and IL-15 have been identified as growth factors, as they can increase the expression of Bcl-2 and the transcription factors STAT2, STAT5, and STAT6 [10]. The decreased IL-7 levels observed in our SS patient cohort may have been due to IL-7 consumption, as most of the patients

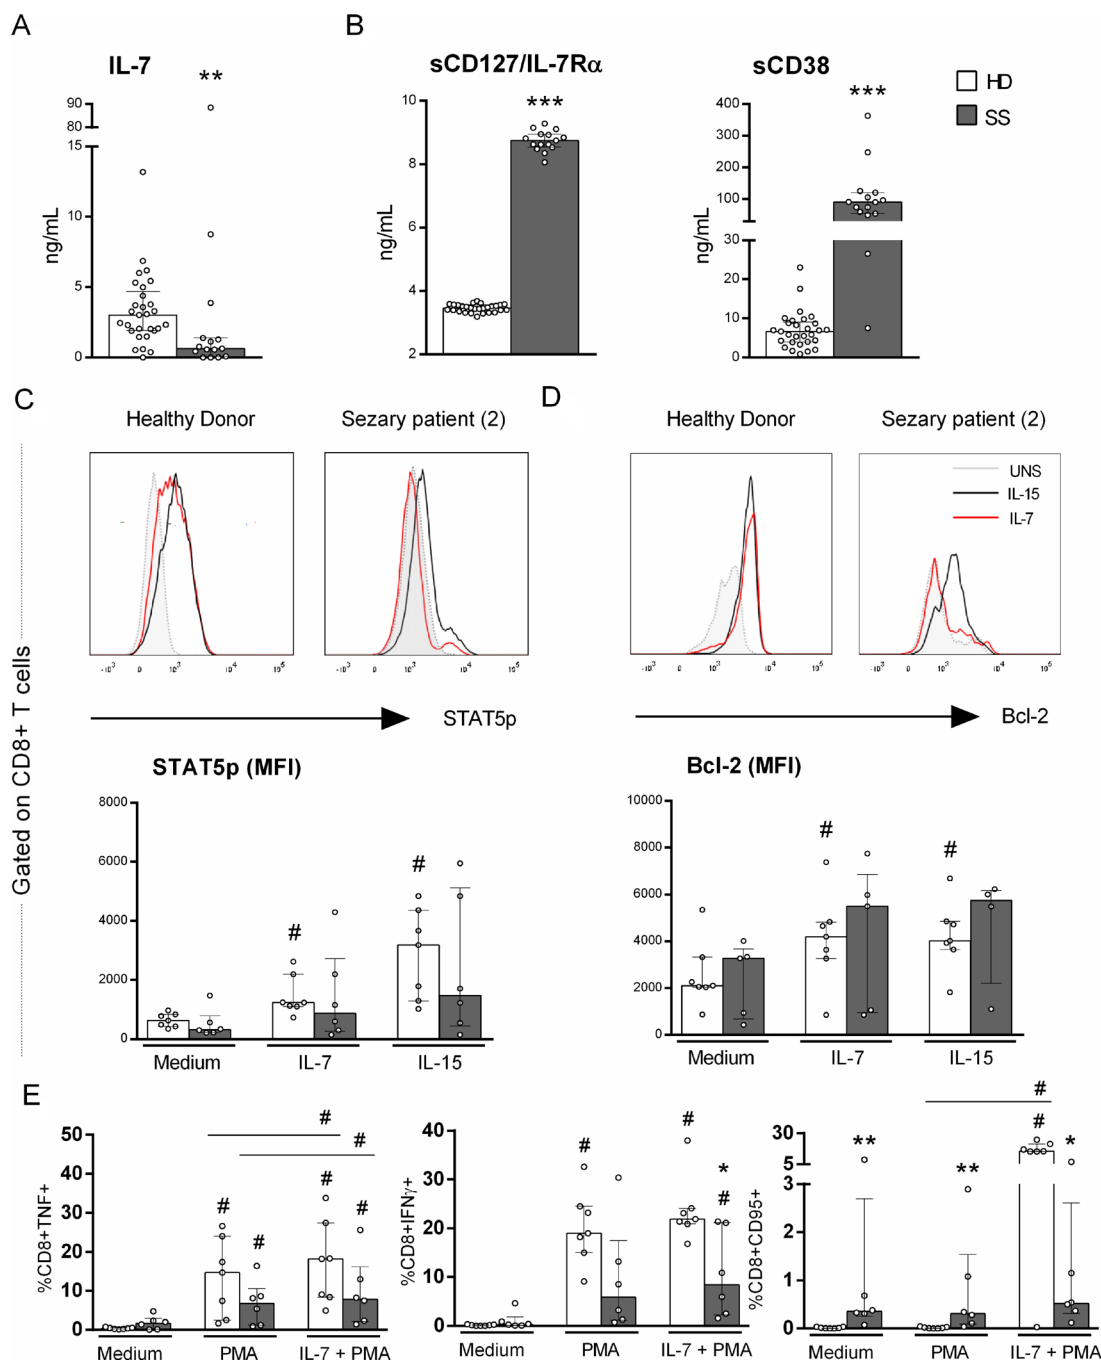

**Figure 3: Impaired response to IL-7 of CD8+ T cells from Sézary patients.** IL-7-signaling on CD8+ T cells from PBMC of SS patients and healthy donors was evaluated for STAT5 phosphorylation, Bcl-2 and CD95/Fas expression and TNF and IFN $\gamma$  production by flow cytometry. Serum soluble CD127 (IL-7R $\alpha$ ), CD38 and IL-7 were evaluated by ELISA and flow cytometry, respectively ( $n = 15$  SS and 28 HD). (A) serum IL-7, (B) serum sCD127/IL-7R $\alpha$  and sCD38, (C) STAT5p ( $n = 6$  SS and 7 HD), (D) Bcl-2 expression ( $n = 5$  SS and 7 HD) and (E) CD95/Fas expression, TNF and IFN $\gamma$  production induced by PMA and Ionomycin stimulation with previously IL-7 priming ( $n = 6$  SS and 7 HD). The data are shown as median and interquartil. \* $p \leq 0.05$ , \*\* $p \leq 0.01$ , \*\*\* $p \leq 0.001$  when compared between groups and # $\leq 0.05$  when compared with the same group.

showed lymphoproliferation of malignant CD4<sup>+</sup> T cells. Moreover, the high sCD127 levels should compete with cell-associated CD127, thus reducing IL-7 serum amounts. We verified the impaired CD8<sup>+</sup>T cell responsiveness to STAT5 and Bcl-2 expression even with *in vitro* IL-7 priming. Increased IL-7 plasma levels have been observed in CTCL patients of stages I-III stage but not in those of stage V [37]. Other diseases with metabolic alterations, such as autoimmune diabetes, have exhibited high serum sCD127 concentrations at the onset of type 1 diabetes [38], showing that metabolic factors may contribute to dysregulation of the IL-7/IL-7 receptor pathway.

Although the loss of CD26 in CD4 T cells is a hallmark of CTCL, our SS patients exhibited a decreased percentage of circulating CD8<sup>+</sup>CD26<sup>+</sup> T cells. CD26, a T cell activation antigen, is a 110kDa cell surface glycoprotein with dipeptidyl peptidase IV activity that inactivates or degrades some bioactive peptides and chemokines [39]. DPPIV/CD26 can regulate cell processes, acting as either a tumour suppressor or tumour activator [40]. The decreased CD8<sup>+</sup>CD26<sup>+</sup> T cell population could reveal the impaired activation of this subset, which comprises mainly memory effector cells. CD26 also has a soluble form, an enzymatically active isoform, which we did not analyse in the SS patients. The decreased CD26 expression exhibited by both unstimulated CD8<sup>+</sup>TNF<sup>+</sup> T cells and CD8<sup>+</sup>TNF<sup>+</sup> T cells activated with TLR7/TLR8 revealed the attenuated status of CD8<sup>+</sup> T cells. The loss or alteration of DPPIV expression is linked to the development of several types of cancer, including prostate [41, 42], lung [43], breast [44], hepatocellular carcinoma [45], ovarian [46], and melanoma [47]. However, the increased CD38 expression associated with decreased CD127 and CD26 expression emphasizes the activation profile of CD8<sup>+</sup> T cells in SS.

Altogether, our data showed a chronic activation profile of CD8<sup>+</sup> T cells with impaired IL-7/IL-7R axis in patients with SS and soluble factors reflecting the commitment of immune effector cells.

## MATERIALS AND METHODS

### Patients

This study included SS patients ( $n = 19$ , 9 males, 10 females) with a median age of 60 years (ranging from 33–76 years) from the Clinic of Cutaneous Lymphomas of the Hospital das Clínicas Department of Dermatology at the University of São Paulo Medical School in Brazil (HCFMUSP). SS diagnoses were established according to the revised clinical, histological, and biological criteria proposed by the International Society for Cutaneous Lymphomas (ISCL) and the cutaneous lymphoma task force of the European Organization of Research and Treatment of Cancer (EORTC). All of the SS patients exhibited “*de novo*” erythrodermia, none of the cases

were derived from mycosis fungoides progression. Healthy donors (HDs) ( $n = 28$ , 14 males, 14 females) with a median age of 54 years (ranging from 30–85 years) were recruited from the Laboratory of Dermatology and Immunodeficiencies (LIM-56). Blood collection was performed before the initiation of treatment (with exception of two cases, that were under treatment), and subjects with dermatological disease or autoimmune disease were excluded from the evaluation. Study exclusion criteria consisted of treatment with immunosuppressant or immune-modifying drugs, pregnancy, and age younger than 18 years. This study was approved by the São Paulo University Institutional Use Committee (CAAE, 07965312.0.0000.0068), and informed consent was obtained from all subjects. All experimental protocols used in this study were performed in accordance to the Ethics Committee of São Paulo University.

### Cell cultures

Mononuclear cells (CMNs) were isolated from heparinized venous blood by Ficoll-Hypaque gradient centrifugation (GE Healthcare Bio-Sciences, Uppsala, Sweden) and diluted in RPMI medium supplemented with 10% AB human serum (Sigma, St Louis, MO, USA). CMNs ( $2 \times 10^6$  cells/mL) were incubated with either a TLR7/8 agonist (CL097, 5  $\mu$ g/mL; Invivogen, San Diego, CA, USA) or phorbol myristate acetate (PMA, 50 ng/mL; Sigma, San Diego, CA, USA), ionomycin (1  $\mu$ g/mL; Sigma) and CD107a PE-Cy5 (Pe.Cy5/clone H4A3; BD Biosciences, San José, CA, USA) at 37°C and 5% CO<sub>2</sub>. After 6 h of incubation, Brefeldin A (10  $\mu$ g/mL; Sigma) was added, and the mixtures were incubated for 14 h at 37°C and 5% CO<sub>2</sub>. In some assays, CMNs were primed with rhIL-7 (20 ng/mL; Peprotech, Rocky Hill, NJ, USA) for 24 hr and then stimulated with PMA plus ionomycin. To verify B cell lymphoma 2 (Bcl-2) expression, CMNs were incubated with IL-7 (10 ng/mL) or IL-15 (10 ng/mL; Peprotech) for 48 hours.

### Flow cytometry

To analyse peripheral blood CD8<sup>+</sup> T cells, venous blood was collected in EDTA-enriched tubes. Approximately 70  $\mu$ L of whole blood was stained for 20 minutes and then incubated for 15 minutes with FACS lysing solution (BD Biosciences) to lyse the erythrocytes. Staining was performed using the following antibodies: CD3-BV605 (SK7), CD4-PE-CF594 (RPA-T4), CD8-V500 (RPA-T8), CCR7-AlexaFluor 647 (3D12), CD45RA-APCH7 (HI100), CD26-FITC (M-A261), CD7-Violet 421 (M-T701), CD38-AlexaFluor 700 (HI2), PD1-PE (MIH4), CD127-PeCy7 (HIL-7R-M21) and PDL1-PeCy7 (MIHI). We considered naïve T cells, double-positive cells; CCR7<sup>+</sup> single-positive cells were considered central memory; double-negative cells were considered effectors and

CD45RA<sup>+</sup> single-positive cells were considered terminally differentiated effectors). To analyse T cells after culturing, CMNs were washed and incubated with a LIVE/DEAD Fixable Red Dead Cell Stain kit (Invitrogen, Carlsbad, CA, USA) for 30 min at room temperature. This was followed by fixation with a Cytotfix/Cytoperm solution (BD Biosciences) for 20 min and permeabilization with a Perm/Wash solution together with the antibodies for 20 min at 4°C. Staining was performed using the following antibodies: CD3-BV605 (SK7), CD4-V500 (RPA-T4), CD8-AlexaFlur 700 (RPA-T8), CD26-FITC (M-A261), CD69-APC-Cy7 (FN50), IFN $\gamma$ -V450 (B27), TNF-Pecy7 (Mab11), PD1-PE (MIH4), Bcl-2-FITC (100; Biolegend, San Diego, CA, USA), and CD95-V450 (DX2). For P-STAT5 expression, CMNs were primed with rhIL-7 (1 ng/mL), rhIL-15 (1 ng/mL) or medium for 15 min at 37°C. The cells were labelled according to the manufacturer's instructions, and analysis was performed by flow cytometry. Staining was performed using the following antibodies: CD3-BV605 (SK7), CD4-APC (RPA-T4), CD8-V500 (RPA-T8) and STAT5-Texas (PY-694). All antibodies were purchased from BD Biosciences. After washing with isotonic solution (Hemoton SPEC; São Paulo, Brazil), 300,000 events were acquired using a flow cytometer (LRSFortessa; BD Biosciences) with FACSDiva software (BD Biosciences). Data were analysed with FlowJo software version 10 (Tree Star, Inc., Ashland, OR, USA).

### Determination of serum IL-7, sCD127 and sCD38 levels

Serum samples were collected from venous blood and stored at 80°C until use. Serum IL-7 levels were assessed by flow cytometry using a human IL-7 flex set (BD Biosciences) with a detection limit of 10 pg/mL. Serum sCD127/IL-7R levels were evaluated by an enzyme-linked immunosorbent assay (ELISA) using a human IL7R/CD127 ELISA kit (Life Span, Seattle, WA, USA) with a detection limit of 312 pg/mL. Serum sCD38 levels were evaluated by ELISA using a human CD38 ELISA kit (LifeSpan) with a detection limit of 0.78 ng/mL.

### Statistical analyses

For single comparisons, Mann-Whitney *U*-tests were used to compare variables between groups, and Wilcoxon matched pairs tests were used to compare unstimulated and stimulated sample levels or variables molecule expressions between different populations in the same group. *P*-values  $\leq 0.05$  were considered significant. Also, Friedman test was used for multiple comparisons between the same group.

### Author contributions

Performed experiments: M.P.T., K.C.G.M., J.F.L., L.M.O., N.Z.P.; Recruited the patients: M.P.T., K.C.G.M.,

D.R.M., J.C.M., J.P., J.A.S.; Participated in designing research: M.P.T., A.J.S.D., M.N.S., J.A.S.; Wrote the paper: M.P.T., M.N.S.

### ACKNOWLEDGMENTS

We are grateful to all the individuals who participated in the study.

### CONFLICTS OF INTEREST

No conflicts of interest declared.

### FUNDING

This work was supported by the Fundação de Amparo a Pesquisa do Estado de São Paulo under Grant 2014/04865-9; Fundo de Apoio à Dermatologia de São Paulo under Grant 018-2015; and the Laboratório de Investigação Médica, Unidade 56.

### REFERENCES

1. Bradford PT, Devesa SS, Anderson WF, Toro JR. Cutaneous lymphoma incidence patterns in the United States: a population-based study of 3884 cases. *Blood*. 2009; 113:5064–73. <https://doi.org/10.1182/blood-2008-10-184168>.
2. Agar NS, Wedgeworth E, Crichton S, Mitchell TJ, Cox M, Ferreira S, Robson A, Calonje E, Stefanato CM, Wain EM, Wilkins B, Fields PA, Dean A, et al. Survival outcomes and prognostic factors in mycosis fungoides/Sezary syndrome: validation of the revised International Society for Cutaneous Lymphomas/European Organisation for Research and Treatment of Cancer staging proposal. *J Clin Oncol*. 2010; 28:4730–9. <https://doi.org/10.1200/jco.2009.27.7665>.
3. Axelrod PI, Lorber B, Vonderheid EC. Infections complicating mycosis fungoides and Sezary syndrome. *JAMA*. 1992; 267:1354–8.
4. Wilcox RA. Cutaneous T-cell lymphoma: 2014 update on diagnosis, risk-stratification, and management. *Am J Hematol*. 2014; 89:837–51. <https://doi.org/10.1002/ajh.23756>.
5. Manfrere KC, Torrealba MP, Miyashiro DR, Oliveira LM, de Carvalho GC, Lima JF, Branco AC, Pereira NZ, Pereira J, Sanches JA Jr, Sato MN. Toll-like receptor agonists partially restore the production of pro-inflammatory cytokines and type I interferon in Sezary syndrome. *Oncotarget*. 2016; 7:74592–601. <https://doi.org/10.18632/oncotarget.12816>.
6. Bouaziz JD, Ortonne N, Giustiniani J, Schiavon V, Huet D, Bagot M, Bensussan A. Circulating natural killer lymphocytes are potential cytotoxic effectors against autologous malignant cells in sezary syndrome patients. *J Invest Dermatol*. United States. 2005; 1273–8.
7. Wilcox RA, Wada DA, Ziesmer SC, Elswa SF, Comfere NI, Dietz AB, Novak AJ, Witzig TE, Feldman AL, Pittelkow



- MR, Ansell SM. Monocytes promote tumor cell survival in T-cell lymphoproliferative disorders and are impaired in their ability to differentiate into mature dendritic cells. *Blood*. 2009; 114:2936–44. <https://doi.org/10.1182/blood-2009-05-220111>.
8. Lee BN, Duvic M, Tang CK, Bueso-Ramos C, Estrov Z, Reuben JM. Dysregulated synthesis of intracellular type 1 and type 2 cytokines by T cells of patients with cutaneous T-cell lymphoma. *Clin Diagn Lab Immunol*. 1999; 6:79–84.
  9. Netchiporouk E, Litvinov IV, Moreau L, Gilbert M, Sasseville D, Duvic M. Deregulation in STAT signaling is important for cutaneous T-cell lymphoma (CTCL) pathogenesis and cancer progression. *Cell Cycle*. 2014; 13:3331–5. <https://doi.org/10.4161/15384101.2014.965061>.
  10. Qin JZ, Kamarashev J, Zhang CL, Dummer R, Burg G, Dobbeling U. Constitutive and interleukin-7- and interleukin-15-stimulated DNA binding of STAT and novel factors in cutaneous T cell lymphoma cells. *J Invest Dermatol*. 2001; 117:583–9. <https://doi.org/10.1046/j.0022-202x.2001.01436.x>.
  11. Hatano R, Ohnuma K, Yamamoto J, Dang NH, Morimoto C. CD26-mediated co-stimulation in human CD8(+) T cells provokes effector function via pro-inflammatory cytokine production. *Immunology*. 2013; 138:165–72. <https://doi.org/10.1111/imm.12028>.
  12. Sokolowska-Wojdylo M, Wenzel J, Gaffal E, Steitz J, Roszkiewicz J, Bieber T, Tuting T. Absence of CD26 expression on skin-homing CLA+ CD4+ T lymphocytes in peripheral blood is a highly sensitive marker for early diagnosis and therapeutic monitoring of patients with Sezary syndrome. *Clin Exp Dermatol*. 2005; 30:702–6. <https://doi.org/10.1111/j.1365-2230.2005.01904.x>.
  13. Gao J, Zhao L, Wan YY, Zhu B. Mechanism of Action of IL-7 and Its Potential Applications and Limitations in Cancer Immunotherapy. *Int J Mol Sci*. 2015; 16:10267–80. <https://doi.org/10.3390/ijms160510267>.
  14. Abeni D, Frontani M, Sampogna F, Sera F, Bolli S, Corona R, Baliva G, Russo G. Circulating CD8+ lymphocytes, white blood cells, and survival in patients with mycosis fungoides. *Br J Dermatol*. 2005; 153:324–30. <https://doi.org/10.1111/j.1365-2133.2005.06755.x>.
  15. Heald P, Rook A, Perez M, Wintroub B, Knobler R, Jegasothy B, Gasparro F, Berger C, Edelson R. Treatment of erythrodermic cutaneous T-cell lymphoma with extracorporeal photochemotherapy. *J Am Acad Dermatol*. 1992; 27:427–33.
  16. Hoppe RT, Medeiros LJ, Warnke RA, Wood GS. CD8-positive tumor-infiltrating lymphocytes influence the long-term survival of patients with mycosis fungoides. *J Am Acad Dermatol*. 1995; 32:448–53.
  17. Reiser J, Banerjee A. Effector, Memory, and Dysfunctional CD8(+) T Cell Fates in the Antitumor Immune Response. *J Immunol Res*. 2016; 2016: 8941260. <https://doi.org/10.1155/2016/8941260>.
  18. Schluns KS, Kieper WC, Jameson SC, Lefrancois L. Interleukin-7 mediates the homeostasis of naive and memory CD8 T cells *in vivo*. *Nat Immunol*. 2000; 1:426–32. <https://doi.org/10.1038/80868>.
  19. Liu Z, Cumberland WG, Hultin LE, Kaplan AH, Detels R, Giorgi JV. CD8+ T-lymphocyte activation in HIV-1 disease reflects an aspect of pathogenesis distinct from viral burden and immunodeficiency. *J Acquir Immune Defic Syndr Hum Retrovirol*. 1998; 18:332–40.
  20. Manfrere KC, Torrealba MP, Miyashiro DR, Oliveira LM, de Carvalho GC, Lima JF, Branco AC, Pereira NZ, Pereira J, Sanches JA Jr, Sato MN. Toll-like receptor agonists partially restore the production of pro-inflammatory cytokines and type I interferon in Sézary syndrome. *Oncotarget*. 2016; 7:4592–601. <https://doi.org/10.18632/oncotarget.12816>.
  21. Venet F, Foray AP, Villars-Mechin A, Malcus C, Poitevin-Later F, Lepape A, Monneret G. IL-7 restores lymphocyte functions in septic patients. *J Immunol*. 2012; 189:5073–81. <https://doi.org/10.4049/jimmunol.1202062>.
  22. Mocroft A, Bofill M, Lipman M, Medina E, Borthwick N, Timms A, Batista L, Winter M, Sabin CA, Johnson M, Lee CA, Phillips A, Janossy G. CD8+, CD38+ lymphocyte percent: a useful immunological marker for monitoring HIV-1-infected patients. *J Acquir Immune Defic Syndr Hum Retrovirol*. 1997; 14:158–62.
  23. Gonzalez VD, Falconer K, Blom KG, Reichard O, Morn B, Laursen AL, Weis N, Alaeus A, Sandberg JK. High levels of chronic immune activation in the T-cell compartments of patients coinfecting with hepatitis C virus and human immunodeficiency virus type 1 and on highly active antiretroviral therapy are reverted by alpha interferon and ribavirin treatment. *J Virol*. 2009; 83:11407–11. <https://doi.org/10.1128/jvi.01211-09>.
  24. Appay V, Sauce D. Immune activation and inflammation in HIV-1 infection: causes and consequences. *J Pathol*. 2008; 214:231–41. <https://doi.org/10.1002/path.2276>.
  25. Manel N, Hogstad B, Wang Y, Levy DE, Unutmaz D, Littman DR. A cryptic sensor for HIV-1 activates antiviral innate immunity in dendritic cells. *Nature*. 2010; 467:214–7. <https://doi.org/10.1038/nature09337>.
  26. Wherry EJ. T cell exhaustion. *Nat Immunol*. 2011; 12:492–9.
  27. Mogensen TH, Melchjorsen J, Larsen CS, Paludan SR. Innate immune recognition and activation during HIV infection. *Retrovirology*. 2010; 7:54. <https://doi.org/10.1186/1742-4690-7-54>.
  28. Brenchley JM, Price DA, Schacker TW, Asher TE, Silvestri G, Rao S, Kazzaz Z, Bornstein E, Lambotte O, Altmann D, Blazar BR, Rodriguez B, Teixeira-Johnson L, et al. Microbial translocation is a cause of systemic immune activation in chronic HIV infection. *Nat Med*. 2006; 12:1365–71. <https://doi.org/10.1038/nm1511>.
  29. Okoye IS, Houghton M, Tyrrell L, Barakat K, Elahi S. Coinhibitory Receptor Expression and Immune Checkpoint

- Blockade: Maintaining a Balance in CD8+ T Cell Responses to Chronic Viral Infections and Cancer. *Front Immunol.* 2017; 8:1215. <https://doi.org/10.3389/fimmu.2017.01215>.
30. Angelosanto JM, Blackburn SD, Crawford A, Wherry EJ. Progressive loss of memory T cell potential and commitment to exhaustion during chronic viral infection. *J Virol.* 2012; 86:8161–70. <https://doi.org/10.1128/jvi.00889-12>.
  31. Kostense S, Vandenberghe K, Joling J, Van Baarle D, Nanlohy N, Manting E, Miedema F. Persistent numbers of tetramer+ CD8(+) T cells, but loss of interferon-gamma+ HIV-specific T cells during progression to AIDS. *Blood.* 2002; 99:2505–11.
  32. Ouyang Q, Wagner WM, Wikby A, Remarque E, Pawelec G. Compromised interferon gamma (IFN-gamma) production in the elderly to both acute and latent viral antigen stimulation: contribution to the immune risk phenotype? *Eur Cytokine Netw.* 2002; 13:392–4.
  33. Axelrod PI, Lorber B, Vonderheid EC. Infections complicating mycosis fungoides and Sézary syndrome. *JAMA.* 1992; 267:1354–8.
  34. Kiazzyk SA, Fowke KR. Loss of CD127 expression links immune activation and CD4(+) T cell loss in HIV infection. *Trends Microbiol.* 2008; 16:567–73. <https://doi.org/10.1016/j.tim.2008.08.011>.
  35. Lebedev MJ, Egorova NI, Sholkina MN, Vilkov SA, Baryshnikov AJ, Novikov VV. Serum levels of different forms of soluble CD38 antigen in burned patients. *Burns.* 2004; 30:552–6. <https://doi.org/10.1016/j.burns.2004.01.029>.
  36. Kim BJ, Choi YM, Rah SY, Park DR, Park SA, Chung YJ, Park SM, Park JK, Jang KY, Kim UH. Seminal CD38 is a pivotal regulator for fetomaternal tolerance. *Proc Natl Acad Sci U S A.* 2015; 112:1559–64. <https://doi.org/10.1073/pnas.1413493112>.
  37. Yamanaka K, Clark R, Rich B, Dowgiert R, Hirahara K, Hurwitz D, Shibata M, Mirchandani N, Jones DA, Goddard DS, Eapen S, Mizutani H, Kupper TS. Skin-derived interleukin-7 contributes to the proliferation of lymphocytes in cutaneous T-cell lymphoma. *Blood.* 2006; 107:2440–5. <https://doi.org/10.1182/blood-2005-03-1139>.
  38. Monti P, Brigatti C, Krasmann M, Ziegler AG, Bonifacio E. Concentration and activity of the soluble form of the interleukin-7 receptor alpha in type 1 diabetes identifies an interplay between hyperglycemia and immune function. *Diabetes.* 2013; 62:2500–8. <https://doi.org/10.2337/db12-1726>.
  39. Proost P, Struyf S, Couvreur M, Lenaerts JP, Conings R, Menten P, Verhaert P, Wuyts A, Van Damme J. Posttranslational modifications affect the activity of the human monocyte chemotactic proteins MCP-1 and MCP-2: identification of MCP-2(6-76) as a natural chemokine inhibitor. *J Immunol.* 1998; 160:4034–41.
  40. Havre PA, Abe M, Urasaki Y, Ohnuma K, Morimoto C, Dang NH. The role of CD26/dipeptidyl peptidase IV in cancer. *Front Biosci.* 2008; 13:1634–45.
  41. Sun YX, Pedersen EA, Shiozawa Y, Havens AM, Jung Y, Wang J, Pienta KJ, Taichman RS. CD26/dipeptidyl peptidase IV regulates prostate cancer metastasis by degrading SDF-1/CXCL12. *Clin Exp Metastasis.* 2008; 25:765–76. <https://doi.org/10.1007/s10585-008-9188-9>.
  42. Wesley UV, McGroarty M, Homoyouni A. Dipeptidyl peptidase inhibits malignant phenotype of prostate cancer cells by blocking basic fibroblast growth factor signaling pathway. *Cancer Res.* 2005; 65:1325–34. <https://doi.org/10.1158/0008-5472.can-04-1852>.
  43. Wesley UV, Tiwari S, Houghton AN. Role for dipeptidyl peptidase IV in tumor suppression of human non small cell lung carcinoma cells. *Int J Cancer.* 2004; 109:855–66. <https://doi.org/10.1002/ijc.20091>.
  44. Eric-Nikolic A, Matic IZ, Dordevic M, Milovanovic Z, Markovic I, Dzodic R, Inic M, Srdic-Rajic T, Jevric M, Gavrilovic D, Cordero OJ, Juranic ZD. Serum DPPIV activity and CD26 expression on lymphocytes in patients with benign or malignant breast tumors. *Immunobiology.* 2011; 216:942–6. <https://doi.org/10.1016/j.imbio.2011.01.005>.
  45. Stecca BA, Nardo B, Chieco P, Mazziotti A, Bolondi L, Cavallari A. Aberrant dipeptidyl peptidase IV (DPP IV/CD26) expression in human hepatocellular carcinoma. *J Hepatol.* 1997; 27:337–45.
  46. Kajiyama H, Shibata K, Terauchi M, Ino K, Nawa A, Kikkawa F. Involvement of DPPIV/CD26 in epithelial morphology and suppressed invasive ability in ovarian carcinoma cells. *Ann N Y Acad Sci.* 2006; 1086:233–40. <https://doi.org/10.1196/annals.1377.007>.
  47. Matic IZ, Ethordic M, Grozdanic N, Damjanovic A, Kolundzija B, Eric-Nikolic A, Dzodic R, Sasic M, Nikolic S, Dobrosavljevic D, Raskovic S, Andrejevic S, Gavrilovic D, et al. Serum activity of DPPIV and its expression on lymphocytes in patients with melanoma and in people with vitiligo. *BMC Immunol.* 2012; 13:48. <https://doi.org/10.1186/1471-2172-13-48>.
