# Supplementary material for: Chronic activation profile of circulating CD8+ T cells in Sézary syndrome
Source: PubMed Central journal article supplement (PMC5790478; doi:10.18632/oncotarget.23334), 2017-12-16
Supplement: oncotarget-09-3497-s001.pdf [file oncotarget-09-3497-s001.pdf]

# Chronic activation profile of circulating CD8+ T cells in Sézary syndrome

## SUPPLEMENTARY MATERIALS

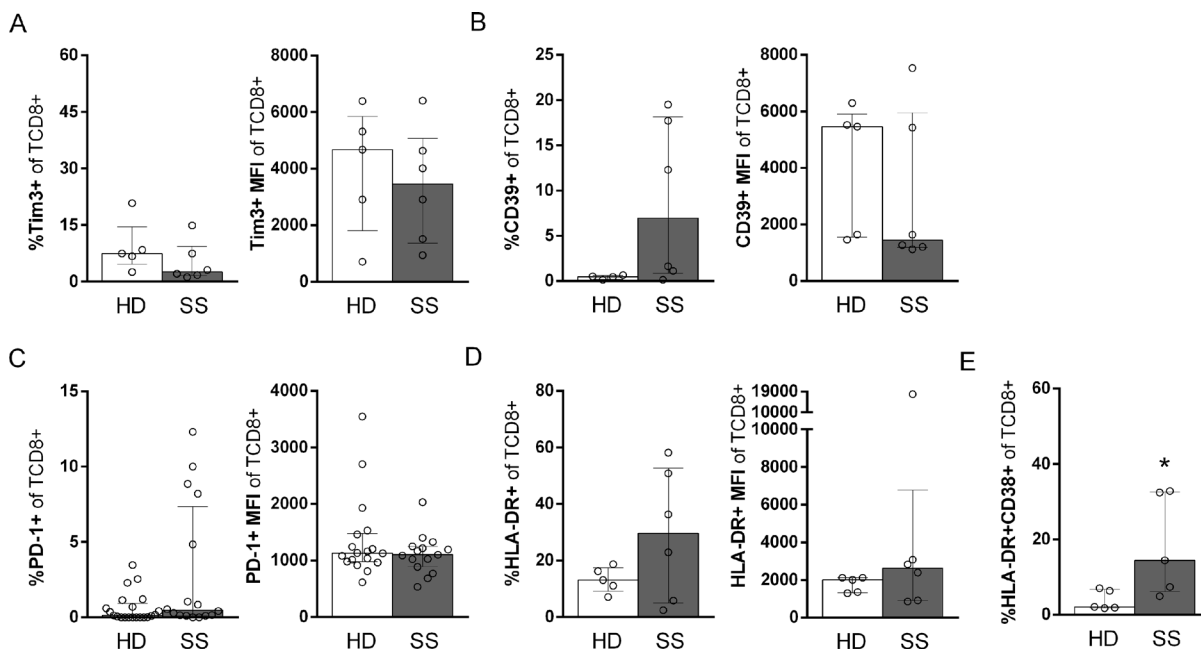

**Supplementary Figure 1: Circulating CD8+ T cells from SS patients and healthy donors were assessed for activation and inhibition markers.** CD8+ T cells expressing (A) Tim3 and MFI ( $n = 6$  SS and 5 HD), (B) CD39+ and MFI ( $n = 6$  SS and 4 HD), (C) PD-1+ and MFI ( $n = 17$  SS and 21 HD); (D) HLA-DR and MFI ( $n = 6$  SS and 5 HD) and (E) HLA-DR+CD38+ ( $n = 6$  SS and 5 HD) were assessed by flow cytometry. The data are shown as median and interquartil. \* $p \leq 0.05$ .

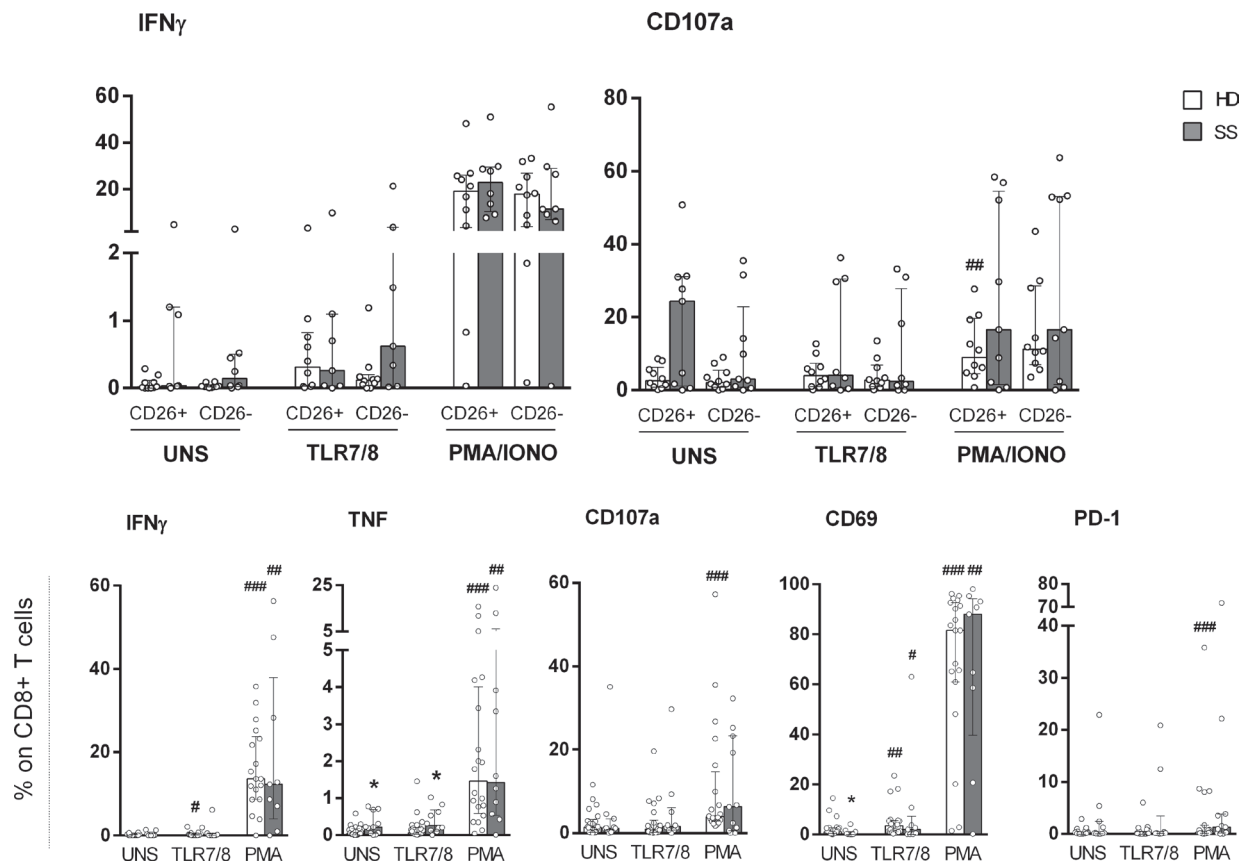

**Supplementary Figure 2: Circulating CD8<sup>+</sup> T cells from SS patients and healthy donors were assessed for cytokines production and activation.** CD8<sup>+</sup> T cells expressing (A) IFN $\gamma$  production and CD107a according to CD26<sup>+</sup> expression ( $n = 9$  SS and 10 HD), (B) IFN $\gamma$ , TNF production and CD69, PD-1 and CD107a were assessed by flow cytometry ( $n = 9$  SS and 21 HD). The data are shown as median and interquartil.  $p \leq 0.05$ ,  $**p \leq 0.01$ ,  $***p \leq 0.001$ , when compared between groups and  $\# \leq 0.05$ ,  $##p \leq 0.01$ ,  $###p \leq 0.001$  when compared with unstimulated condition.
